# Supplementary material
Source: Springer Nature journal article supplement (https://www.springermedizin.de/resource/supplementary/12889_2014_6447_MOESM2_ESM.pdf/9498082)
Supplement: MOESM2 [file 9498082]

## Additional file 2. Measurement items of each determinant per energy balance-related behaviour of the EPHE parental questionnaire.

| Family Environmental categorised correlates |                                                                                                               |                                                                                                                                                                                                                                                                                                                                                                                               |                                                                                                                                                                                                                                                                                                                                                                                                                                                                                                                      |                                                                                                                                                                                                                                                                                                                                                                                                                                                                                                                                                                                                                                                           |                                                                                                                                                                                                                                                                                                                                                                                                                                                                                                                                                                                                                                                            |                                                                                                                                                                                                                                                                                                                                                                                                                                                                                                                                                                                                                                                    |                                                                                                                                                                                                                                                                                                                                                                                                                                                                                                                                                                                                                                       |
|---------------------------------------------|---------------------------------------------------------------------------------------------------------------|-----------------------------------------------------------------------------------------------------------------------------------------------------------------------------------------------------------------------------------------------------------------------------------------------------------------------------------------------------------------------------------------------|----------------------------------------------------------------------------------------------------------------------------------------------------------------------------------------------------------------------------------------------------------------------------------------------------------------------------------------------------------------------------------------------------------------------------------------------------------------------------------------------------------------------|-----------------------------------------------------------------------------------------------------------------------------------------------------------------------------------------------------------------------------------------------------------------------------------------------------------------------------------------------------------------------------------------------------------------------------------------------------------------------------------------------------------------------------------------------------------------------------------------------------------------------------------------------------------|------------------------------------------------------------------------------------------------------------------------------------------------------------------------------------------------------------------------------------------------------------------------------------------------------------------------------------------------------------------------------------------------------------------------------------------------------------------------------------------------------------------------------------------------------------------------------------------------------------------------------------------------------------|----------------------------------------------------------------------------------------------------------------------------------------------------------------------------------------------------------------------------------------------------------------------------------------------------------------------------------------------------------------------------------------------------------------------------------------------------------------------------------------------------------------------------------------------------------------------------------------------------------------------------------------------------|---------------------------------------------------------------------------------------------------------------------------------------------------------------------------------------------------------------------------------------------------------------------------------------------------------------------------------------------------------------------------------------------------------------------------------------------------------------------------------------------------------------------------------------------------------------------------------------------------------------------------------------|
| Description                                 | Fruit <sup>a</sup>                                                                                            | Vegetables <sup>a</sup>                                                                                                                                                                                                                                                                                                                                                                       | Water                                                                                                                                                                                                                                                                                                                                                                                                                                                                                                                | Fruit juices <sup>b</sup>                                                                                                                                                                                                                                                                                                                                                                                                                                                                                                                                                                                                                                 | Soft drinks <sup>b</sup>                                                                                                                                                                                                                                                                                                                                                                                                                                                                                                                                                                                                                                   | Television viewing <sup>b</sup>                                                                                                                                                                                                                                                                                                                                                                                                                                                                                                                                                                                                                    | Computer time                                                                                                                                                                                                                                                                                                                                                                                                                                                                                                                                                                                                                         |
| <i>Social Environment</i>                   |                                                                                                               |                                                                                                                                                                                                                                                                                                                                                                                               |                                                                                                                                                                                                                                                                                                                                                                                                                                                                                                                      |                                                                                                                                                                                                                                                                                                                                                                                                                                                                                                                                                                                                                                                           |                                                                                                                                                                                                                                                                                                                                                                                                                                                                                                                                                                                                                                                            |                                                                                                                                                                                                                                                                                                                                                                                                                                                                                                                                                                                                                                                    |                                                                                                                                                                                                                                                                                                                                                                                                                                                                                                                                                                                                                                       |
| Parenting practices                         | Assessing parenting rules and practices applied to the child in relation to Energy balance-related behaviours | <ol style="list-style-type: none"> <li>1. My spouse/partner and/or I often encourage our child to eat fruits.</li> <li>2. Do you and/or your spouse/partner tell your child to eat fruit every day?</li> <li>3. Is your child allowed to eat as much fruit as (s)he likes at home?</li> <li>4. Do you or your spouse/partner usually cut up fruit for your child in between meals?</li> </ol> | <ol style="list-style-type: none"> <li>1. My spouse/partner and/or I often encourage our child to eat vegetables every day.</li> <li>2. Do you and/or your spouse/partner tell your child to eat vegetables every day?</li> <li>3. Is your child allowed to eat as many vegetables as (s)he would like at home?</li> <li>4. Do you or your spouse/partner usually cut up vegetables for your child in between meals?</li> <li>5. Are there usually vegetables served with dinner (or lunch) at your home?</li> </ol> | <ol style="list-style-type: none"> <li>1. I pay attention to the amount of fruit juices my child drinks.</li> <li>2. If my child asks for fruit juices, I will give it to him/her.</li> <li>3. My child is allowed to take fruit juices whenever (s)he wants.</li> <li>4. I negotiate with my child how much fruit juices (s)he is allowed to drink.</li> <li>5. How often do you tell your child that fruit juices are not good for him/her?</li> <li>6. How often do you tell your child that fruit juices make him/her fat?</li> <li>7. If I would like to drink fruit juices, I would restrain myself because of the presence of my child.</li> </ol> | <ol style="list-style-type: none"> <li>1. I pay attention to the amount of soft drinks my child drinks.</li> <li>2. If my child asks for soft drinks, I will give it to him/her.</li> <li>3. My child is allowed to take soft drinks whenever (s)he wants.</li> <li>3. How often do you tell your child that soft drinks are not good for him/her?</li> <li>4. How often do you tell your child that soft drinks make him/her fat?</li> <li>5. If I would like to drink soft drinks, I would restrain myself because of the presence of my child.</li> <li>6. If I prohibit my child from drinking soft drinks, I find it difficult to stick to</li> </ol> | <ol style="list-style-type: none"> <li>1. I pay attention to the amount of the time my child watches TV.</li> <li>2. If my child asks if (s)he is allowed to watch TV I will allow it.</li> <li>3. My child is allowed to watch TV whenever (s)he wants.</li> <li>4. I negotiate with my child how much (s)he is allowed to watch TV.</li> <li>5. If I would like to watch TV for leisure time, I would restrain myself because of the presence of my child.</li> <li>6. If I prohibit my child from watching TV, I find it difficult to stick to my rule(s) if (s)he starts negotiating.</li> <li>7. I allow my child to watch TV as a</li> </ol> | <ol style="list-style-type: none"> <li>1. I pay attention to the amount of the time my child plays computer games.</li> <li>2. If my child asks if (s)he is allowed to play computer games I will allow it.</li> <li>3. My child is allowed to play computer games whenever (s)he wants.</li> <li>4. I negotiate with my child how much (s)he is allowed to play computer games.</li> <li>5. If I would like to use the computer for leisure time, I would restrain myself because of the presence of my child.</li> <li>6. If I prohibit my child from playing computer games, I find it difficult to stick to my rule(s)</li> </ol> |

**Additional file 2. Measurement items of each determinant per energy balance-related behaviour of the EPHE parental questionnaire (continued).**

|                           |                                                                                                     |                                                                                                                                              |                                                                                                                                                   |                                                                                                                               |                                                                                                      |                                                                                                         |                                                                                                         |
|---------------------------|-----------------------------------------------------------------------------------------------------|----------------------------------------------------------------------------------------------------------------------------------------------|---------------------------------------------------------------------------------------------------------------------------------------------------|-------------------------------------------------------------------------------------------------------------------------------|------------------------------------------------------------------------------------------------------|---------------------------------------------------------------------------------------------------------|---------------------------------------------------------------------------------------------------------|
|                           |                                                                                                     |                                                                                                                                              |                                                                                                                                                   | 8. If I prohibit my child from drinking fruit juices, I find it difficult to stick to my rule(s) if (s)he starts negotiating. | my rule(s) if (s)he starts negotiating.                                                              | reward or to comfort him/her.                                                                           | if (s)he starts negotiating.                                                                            |
|                           |                                                                                                     |                                                                                                                                              |                                                                                                                                                   | 9. I give fruit juices to my child as a reward or to comfort him/her.                                                         | 7. I give soft drinks to my child as a reward or to comfort him/her.                                 | 8. How often do you tell to your child that watching TV/playing computer games is not good for him/her? | 7. I allow my child to play computer games as a reward or to comfort him/her.                           |
|                           |                                                                                                     |                                                                                                                                              |                                                                                                                                                   |                                                                                                                               |                                                                                                      | 9. How often do you tell to your child that watching TV/playing computer games makes him/her fat?       | 8. How often do you tell to your child that watching TV/playing computer games is not good for him/her? |
|                           |                                                                                                     |                                                                                                                                              |                                                                                                                                                   |                                                                                                                               |                                                                                                      |                                                                                                         | 9. How often do you tell to your child that watching TV/playing computer games makes him/her fat?       |
| Parental knowledge        | Assessing parental perception of child's dietary intake and knowledge of recommended dietary intake | 1. Do you think that your child eats much or a little fruit?<br>2. How much fruit do you think your child should eat to have a healthy diet? | 1. Do you think that your child eats many or few vegetables?<br>2. How many vegetables do you think your child should eat to have a healthy diet? |                                                                                                                               |                                                                                                      |                                                                                                         |                                                                                                         |
| Performing EBRB together  | Assessing the frequency that parents conduct the EBRB together with their child                     | 1. We often eat fruit together the whole family.                                                                                             | 1. We often eat vegetables together the whole family.                                                                                             | 1. How often do you and/or your spouse/partner drink fruit juices together with your child?                                   | 1. How often do you (one parent/ spouse/partner or both) drink soft drinks together with your child? | 1. How often do you and/or spouse/ partner watch television together with your child?                   | 1. How often do you and/or spouse/ partner play computer games together with your child?                |
| Child's nagging behaviour | Assess the child's reaction when parent prohibits an                                                |                                                                                                                                              |                                                                                                                                                   | 1. If I prohibit my child from                                                                                                | 1. If I prohibit my child from                                                                       | 1. If I prohibit my child to watch TV                                                                   | 1. If I prohibit my child to use the                                                                    |

**Additional file 2. Measurement items of each determinant per energy balance-related behaviour of the EPHE parental questionnaire (continued).**

| action                                                 |                                                                                                                                        | drinking fruit juices, (s)he tries to drink anyway.                                                                    | drinking soft drinks, (s)he tries to drink anyway.                                                                                | for leisure time, (s)he would do it anyway.                                                                                                                        | computer for leisure time, (s)he would do it anyway.                                                                                                  |                                                                              |
|--------------------------------------------------------|----------------------------------------------------------------------------------------------------------------------------------------|------------------------------------------------------------------------------------------------------------------------|-----------------------------------------------------------------------------------------------------------------------------------|--------------------------------------------------------------------------------------------------------------------------------------------------------------------|-------------------------------------------------------------------------------------------------------------------------------------------------------|------------------------------------------------------------------------------|
| <i>Physical Environment</i>                            |                                                                                                                                        |                                                                                                                        |                                                                                                                                   |                                                                                                                                                                    |                                                                                                                                                       |                                                                              |
| Home availability                                      | Assessing whether specific food products or equipment related to Energy balance-related behaviours are available at home for the child | 1. Are there usually different kinds of fruits available in your home?                                                 | 1. Are there usually different kinds of vegetables available in your home?                                                        | 1. There are fruit juices available at home for my child.                                                                                                          | 1. There are soft drinks available at home for my child.                                                                                              | 1. TV is available in my child's bedroom.                                    |
| Situation specific habit                               | Assessing the specific situations that child habitually conducts an EBRB                                                               | 1. It is a habit of my child to eat fruit every day.<br>2. Does your child usually bring fruit with him/her at school? | 1. It is a habit for my child to eat vegetables every day.<br>2. Does your child usually bring vegetables with him/her at school? | 1. Does your child drink water during mealtime?<br>2. Does your child drink water between meals?<br>3. Does your child drink water during/after sports or playing? | 1. In which situation(s) is your child most likely to drink fruit juices?<br>1. In which situation(s) is your child most likely to drink soft drinks? | 1. How often is the TV on during dinner (supper/ evening meal) in your home? |
| <b>Family Environmental non-categorised correlates</b> |                                                                                                                                        |                                                                                                                        |                                                                                                                                   |                                                                                                                                                                    |                                                                                                                                                       |                                                                              |
| <i>Economic Environment</i>                            |                                                                                                                                        |                                                                                                                        |                                                                                                                                   |                                                                                                                                                                    |                                                                                                                                                       |                                                                              |
| Price influence                                        | Assessing the influence of price on parent's food choices for their child                                                              | 1. I do not give my child some foods because they cost too much <sup>b</sup>                                           |                                                                                                                                   |                                                                                                                                                                    |                                                                                                                                                       |                                                                              |
| Food characteristics                                   | Assessing characteristics that influence parents' food choice for the child's meal                                                     | 1. What do you consider to be the most important characteristic (s) of your child's meal? <sup>b</sup>                 |                                                                                                                                   |                                                                                                                                                                    |                                                                                                                                                       |                                                                              |

<sup>a</sup> Items of these categories are based on the Pro children [23] and PRO-GREENS [24] child questionnaires.

<sup>b</sup> Items of these categories are derived from the ENERGY parental questionnaire [22].
